# Supplementary material for: Lognormal firing rate distribution reveals prominent fluctuation–driven regime in spinal motor networks
Source: eLife journal article supplement (doi:10.7554/elife.18805), 2016-10-26
Supplement: supp [file elife-18805-supp-v1.zip]

Archive with 10 entries (10 files):
- elife_poa_e18805_Video_1.mp4
- elife_poa_e18805_Figure_2_figure_supplement_2.eps
- elife_poa_e18805_Video_2.mp4
- elife_poa_e18805_Figure_2_figure_supplement_1.pdf
- elife_poa_e18805_Figure_3_figure_supplement_1.eps
- elife_poa_e18805_Source_Code.sty
- elife_poa_e18805_Figure_10_figure_supplement_1.pdf
- elife_poa_e18805_Figure_8_figure_supplement_1.eps
- elife_poa_e18805_Figure_3_figure_supplement_2.eps
- elife_poa_e18805_Figure_6_figure_supplement_1.eps
