# Supplementary material for: Lognormal firing rate distribution reveals prominent fluctuation–driven regime in spinal motor networks
Source: eLife journal article supplement (doi:10.7554/elife.18805), 2016-10-26
Supplement: supp [file elife-18805-supp-v1.zip › elife_poa_e18805_Source_Code.sty]

%%
%% This is file `newfloat.sty',
%% generated with the docstrip utility.
%%
%% The original source files were:
%%
%% newfloat.dtx  (with options: `package')
%% 
%% Copyright (C) 1994-2012 Axel Sommerfeldt (axel.sommerfeldt@f-m.fm)
%% 
%% --------------------------------------------------------------------------
%% 
%% This work may be distributed and/or modified under the
%% conditions of the LaTeX Project Public License, either version 1.3
%% of this license or (at your option) any later version.
%% The latest version of this license is in
%%   http://www.latex-project.org/lppl.txt
%% and version 1.3 or later is part of all distributions of LaTeX
%% version 2003/12/01 or later.
%% 
%% This work has the LPPL maintenance status "maintained".
%% 
%% This Current Maintainer of this work is Axel Sommerfeldt.
%% 
%% This work consists of the files caption.ins, caption.dtx, caption2.dtx,
%% caption3.dtx, bicaption.dtx, ltcaption.dtx, subcaption.dtx, and newfloat.dtx,
%% the derived files caption.sty, caption2.sty, caption3.sty,
%% bicaption.sty, ltcaption.sty, subcaption.sty, and newfloat.sty,
%% and the user manuals caption-deu.tex, caption-eng.tex, and caption-rus.tex.
%% 
\NeedsTeXFormat{LaTeX2e}[1994/12/01]
\ProvidesPackage{newfloat}[2011/11/16 v1.0a Defining new floating environments (AR)]
\newcommand*\newfloat@Info[1]{%
  \PackageInfo{newfloat}{#1}}
\newcommand*\newfloat@Error[1]{%
  \PackageError{newfloat}{#1}\newfloat@eh}
\newcommand*\newfloat@eh{%
  If you do not understand this error, please take a closer look\MessageBreak
  at the documentation of the `newfloat' package.\MessageBreak\@ehc}
\RequirePackage{keyval}[1997/11/10]
%\newcommand*\DeclareFloatingEnvironment{%
%  \@testopt\@DeclareFloatingEnvironment{}}

\@onlypreamble\DeclareFloatingEnvironment
\def\@DeclareFloatingEnvironment[#1]#2{%
  \newfloat@Info{New float `#2' with options `#1'}%
  \edef\newfloat@Type{\def\noexpand\newfloat@Type{\@car#2\@nil}}%
  \uppercase\expandafter{\newfloat@Type}%
  \edef\@tempa{%
    \noexpand\g@addto@macro\noexpand\newfloat@Type{\@cdr#2\@nil}}%
  \@tempa
  \newcounter{#2}%
  \ifdefined\c@float@type % from float package
    \expandafter\edef\csname ftype@#2\endcsname{\the\value{float@type}}%
    \addtocounter{float@type}{\value{float@type}}%
  \else\ifdefined\c@newflo@tctr % from memoir document class
    \expandafter\edef\csname ftype@#2\endcsname{\the\c@newflo@tctr}%
    \advance\c@newflo@tctr \c@newflo@tctr
  \else
    \ifdefined\newfloat@ftype \else
      \newcount\newfloat@ftype
      \newfloat@ftype=8\relax
    \fi
    \expandafter\xdef\csname ftype@#2\endcsname{\the\newfloat@ftype}%
    \advance\newfloat@ftype\newfloat@ftype
  \fi\fi
  \newfloat@Info{float type `#2'=\@nameuse{ftype@#2}}%
  \@namedef{fnum@#2}{\@nameuse{#2name}\nobreakspace\@nameuse{the#2}}%
  \expandafter\newcommand\csname #2name\endcsname{}%
  \expandafter\let\csname #2name\endcsname\newfloat@Type
  \@namedef{fleg#2}{\@nameuse{#2name}}% legend naming (memoir)
  \@namedef{flegtoc#2}##1{}%
  \newenvironment{#2}{\@float{#2}}{\end@float}%
  \newenvironment{#2*}{\@dblfloat{#2}}{\end@dblfloat}%
  \expandafter\newcommand\csname listof#2s\endcsname{\newfloat@listof{#2}}%
  \expandafter\newcommand\csname listof#2es\endcsname{\newfloat@listof{#2}}%
  \ifdefined\l@figure
    \expandafter\let\csname l@#2\endcsname\l@figure
  \else
    \@namedef{l@#2}{\@dottedtocline{1}{1.5em}{2.3em}}%
  \fi
  \expandafter\newcommand\csname list#2name\endcsname{}%
  \expandafter\xdef\csname list#2name\endcsname{List of \newfloat@Type s}%
  \expandafter\let\csname fst@#2\endcsname\@undefined
  \newfloat@setplacement{#2}{tbp}%
  \newfloat@setfileext{#2}{lo#2}%
  \newfloat@setoptions*{#2}{#1}%
  \@expandtwoargs\newfloat@announce{#2}{\@nameuse{ext@#2}}%
  \@ifnextchar[\newfloat@DFE@setname\relax}
\@onlypreamble\@DeclareFloatingEnvironment
\def\newfloat@DFE@setname[#1]{%
  \KV@@newfloat@name{#1}%
  \@ifnextchar[\newfloat@DFE@setlistname\relax}
\@onlypreamble\newfloat@DFE@setname
\def\newfloat@DFE@setlistname[#1]{%
  \KV@@newfloat@listname{#1}}
\@onlypreamble\newfloat@DFE@setlistname
\newcommand*\newfloat@listof[1]{%
  \ifcsname listoftoc\endcsname
    \expandafter\listoftoc\expandafter{\@nameuse{ext@#1}}%
  \else
    \begingroup
      \expandafter\let\expandafter\listfigurename\csname list#1name\endcsname
      \expandafter\let\expandafter\ext@figure\csname ext@#1\endcsname
      \let\newfloat@ORI@starttoc\@starttoc
      \renewcommand*\@starttoc[1]{%
        \expandafter\newfloat@ORI@starttoc\expandafter{\ext@figure}}%
      \listoffigures
    \endgroup
  \fi}
\newcommand*\newfloat@setoptions{%
  \@ifstar
    {\newfloat@@setoptions\@firstofone}%
    {\newfloat@@setoptions\@gobble}}
\newcommand*\newfloat@@setoptions[3]{%
  \let\newfloat@within@value\@undefined
  \let\newfloat@chapterlistsgaps@value\@undefined
  #1{\KV@@newfloat@within\newfloat@within@default}% set default value for new floats
  \def\newfloat@type{#2}%
  \setkeys{@newfloat}{#3}%
  \ifx\newfloat@within@value\@undefined \else
    \newfloat@setoption{within}\newfloat@within@value
  \fi
  \ifx\newfloat@chapterlistsgaps@value\@undefined \else
    \newfloat@setoption{chapterlistsgaps}\newfloat@chapterlistsgaps@value
  \fi}
\newcommand*\newfloat@within@default{%
  \ifcsname c@chapter\endcsname chapter\else none\fi}
\@onlypreamble\newfloat@within@default
\newcommand*\newfloat@setoption[1]{%
  \expandafter\@expandtwoargs\csname newfloat@set#1\endcsname\newfloat@type}
\newcommand*\newfloat@setfileext[2]{%
  \@namedef{ext@#1}{#2}}
\define@key{@newfloat}{fileext}{%
  \newfloat@setoption{fileext}{#1}}
\newcommand*\newfloat@setlistname[2]{%
  \@namedef{list#1name}{#2}}
\define@key{@newfloat}{listname}{%
  \newfloat@setoption{listname}{#1}}
\newcommand*\newfloat@setname[2]{%
  \newfloat@@setname{#1}{#2}%
  \begingroup
    \ifcsname languagename\endcsname
      \ifcsname captions\languagename\endcsname
        \expandafter\g@addto@macro\csname captions\languagename\endcsname
          {\newfloat@@setname{#1}{#2}}%
      \fi
    \fi
  \endgroup}
%%\AtBeginDocument{\let\newfloat@setname\newfloat@@setname}
\newcommand*\newfloat@@setname[2]{%
  \@namedef{#1name}{#2}}
\define@key{@newfloat}{name}{%
  \newfloat@setoption{name}{#1}}
\newcommand*\newfloat@setplacement[2]{%
  \@namedef{fps@#1}{#2}}
\define@key{@newfloat}{placement}{%
  \newfloat@setoption{placement}{#1}}
\newcommand*\newfloat@setwithin[2]{%
  \ifcsname c@chapter\endcsname
    \@removefromreset{#1}{chapter}%
  \fi
  \@removefromreset{#1}{section}%
  \edef\@tempa{#2}%
  \ifx\@tempa\@empty
    \def\@tempa{none}%
  \fi
  \def\@tempb{none}%
  \ifx\@tempa\@tempb
    \ifcsname c@chapter\endcsname
      \@chapterlistsgap@off{#1}%
    \fi
    \newfloat@@setwithin{#1}{}{}%
  \else
    \def\@tempb{chapter}%
    \ifx\@tempa\@tempb
      \@addtoreset{#1}{chapter}%
      \@chapterlistsgap@on{#1}%
      \newfloat@@setwithin{#1}{\ifnum\c@chapter>\z@ \thechapter.\fi}{\theHchapter.}%
    \else
      \def\@tempb{section}%
      \ifx\@tempa\@tempb
        \@addtoreset{#1}{section}%
        \ifcsname c@chapter\endcsname
          \@addtoreset{#1}{chapter}%
          \@chapterlistsgap@on{#1}%
          \newfloat@@setwithin{#1}{\thesection.}{\theHsection.}%
        \else
          \newfloat@@setwithin{#1}{\ifnum\c@section>\z@ \thesection.\fi}{\theHsection.}%
        \fi
      \else
        \newfloat@Error{Invalid value `#2' for option `within'}%
      \fi
    \fi
  \fi}
\newcommand*\newfloat@@setwithin[3]{%
  \global\@namedef{the#1}{#2\arabic{#1}}%
  \global\@namedef{theH#1}{#3\arabic{#1}}}
\define@key{@newfloat}{within}{%
  \def\newfloat@within@value{#1}}
\newcommand*\newfloat@setwithout[1]{%
  \newfloat@setwithin{#1}{none}}
\define@key{@newfloat}{without}[]{%
  \def\newfloat@within@value{none}}
\newcommand*\newfloat@setchapterlistsgaps[2]{%
  \edef\@tempa{#2}%
  \def\@tempb{off}%
  \ifx\@tempa\@tempb
    \@chapterlistsgap@off{#1}%
  \else
    \def\@tempb{on}%
    \ifx\@tempa\@tempb
      \@chapterlistsgap@on{#1}%
    \else
      \newfloat@Error{Invalid value `#2' for option `chapterlistsgaps'}%
    \fi
  \fi}
\define@key{@newfloat}{chapterlistsgaps}{%
  \def\newfloat@chapterlistsgaps@value{#1}}
\providecommand*\@removefromreset[2]{{%
  \expandafter\let\csname c@#1\endcsname\@removefromreset
  \def\@elt##1{%
    \expandafter\ifx\csname c@##1\endcsname\@removefromreset
    \else
      \noexpand\@elt{##1}%
    \fi}%
  \expandafter\xdef\csname cl@#2\endcsname{%
    \csname cl@#2\endcsname}}}
\newcommand*\newfloat@announce[2]{%
  \@cons\newfloat@list{{#1}}%
  \@cons\newfloat@@list{{#1}}%
  \@ifundefined{newfloat@ext@#2}{%
    \@namedef{newfloat@ext@#2}{#1}%
    \ifcsname c@lofdepth\endcsname
      \@ifundefined{c@#2depth}{%
        \newcounter{#2depth}%
        \setcounter{#2depth}{1}%
      }{}%
    \fi
    \ifcsname addtotoclist\endcsname
      \addtotoclist[float]{#2}%
      \@namedef{listof#2name}{\@nameuse{list#1name}}%
    \fi
  }{}%
  \ifcsname contentsuse\endcsname
    \contentsuse{#1}{#2}%
  \fi
  \newfloat@hook{#1}}
\@onlypreamble\newfloat@announce
\newcommand*\newfloat@@list{}
\newcommand*\SetupFloatingEnvironment[1]{%
  \newfloat@addtolist{#1}%
  \newfloat@setoptions{#1}}
\newcommand\ForEachFloatingEnvironment{%
  \@ifstar
    {\@ForEachFloatingEnvironment\@gobble}%
    {\@ForEachFloatingEnvironment\@iden}}
\newcommand\@ForEachFloatingEnvironment[2]{%
  \def\@elt##1{#2}%
  \newfloat@list
  \let\@elt\relax
  #1{\newfloat@addtohook{#2}}}
\providecommand\newfloat@addtohook[1]{%
  \toks@=\expandafter{\newfloat@hook{##1}#1}%
  \edef\@tempa{\def\noexpand\newfloat@hook####1{\the\toks@}}%
  \@tempa}
\providecommand*\newfloat@hook[1]{}
\newcommand*\newfloat@list{}
\newcommand*\newfloat@addtolist[1]{%
  \newfloat@ifinlist{#1}{}{%
    \ifcsname ext@#1\endcsname
      \@cons\newfloat@list{{#1}}%
      \@namedef{newfloat@ext@\@nameuse{ext@#1}}{#1}%
    \else
      \newfloat@Error{`#1' does not seem to be a floating environment}%
    \fi}}
\newcommand*\newfloat@ifinlist[1]{%
  \let\next\@secondoftwo
  \begingroup
    \expandafter\let\csname c@#1\endcsname\newfloat@ifinlist
    \def\@elt##1{%
      \expandafter\ifx\csname c@##1\endcsname\newfloat@ifinlist
        \global\let\next\@firstoftwo
      \fi}%
    \newfloat@list
  \endgroup
  \next}
\ifcsname ext@figure\endcsname
  \newfloat@addtolist{figure}
\fi
\ifcsname ext@table\endcsname
  \newfloat@addtolist{table}
\fi
\ifcsname @chapter\endcsname
  \providecommand*\@chapterlistsgap{10\p@}%
  \providecommand*\@addchapterlistsgap[2]{%
    \@nameuse{@ifchapterlistsgap@#1}{% if switched on
      \@@addchapterlistsgap{#1}{#2}}}
  \providecommand*\@@addchapterlistsgap[2]{%
    \@ifundefined{@addchapterlistsgap@#2}{% only once per extension
      \@namedef{@addchapterlistsgap@#2}{}%
      \@@@addchapterlistsgap{#2}}{}}
  \providecommand*\@@@addchapterlistsgap[1]{%
    \ifdim \@chapterlistsgap>\z@
      \addtocontents{#1}{\protect\addvspace{\@chapterlistsgap}}%
    \fi}
  \providecommand*\@addchapterlistsgaps{%
    \def\@elt##1{%
      \@expandtwoargs\@addchapterlistsgap{##1}{\@nameuse{ext@##1}}}%
    \newfloat@list
    \let\@elt\relax}
  \providecommand*\@chapterlistsgap@off[1]{%
    \expandafter\let\csname @ifchapterlistsgap@#1\endcsname\@gobble
    \ifcsname unsettoc\endcsname
      \@expandtwoargs\unsettoc{\@nameuse{ext@#1}}{chapteratlist}%
    \fi}
  \providecommand*\@chapterlistsgap@on[1]{%
    \expandafter\let\csname @ifchapterlistsgap@#1\endcsname\@iden
    \ifcsname setuptoc\endcsname
      \@expandtwoargs\setuptoc{\@nameuse{ext@#1}}{chapteratlist}%
    \fi}
\fi
\define@key{newfloat}{chapterlistsgap}{%
  \renewcommand*\@chapterlistsgap{#1}}
\define@key{newfloat}{within}{%
  \def\newfloat@within@default{#1}% set new default value
  \def\@elt##1{\newfloat@setwithin{##1}{#1}}%
  \newfloat@list
  \let\@elt\relax}
\define@key{newfloat}{without}[]{%
  \KV@newfloat@within{none}}
\def\@elt#1{%
  \define@key{newfloat}{#1name}{%
    \newfloat@setname{#1}{##1}}%
  \define@key{newfloat}{list#1name}{%
    \newfloat@setname{list#1}{##1}}%
  \define@key{newfloat}{#1within}{%
    \newfloat@setwithin{#1}{##1}}%
  \define@key{newfloat}{#1without}[]{%
    \newfloat@setwithout{#1}}%
}%
\newfloat@list
\let\@elt\relax
\let\@tempc\relax
\@expandtwoargs\setkeys{newfloat}{\@ptionlist{\@currname.\@currext}}%
\AtEndOfPackage{\let\@unprocessedoptions\relax}
\newcommand*\newfloatsetup{\setkeys{newfloat}}
\newcommand\newfloat@replace@chapter[2]{%
  \begingroup
    \let\if@twocolumn\iffalse
    \let\if@mainmatter\iffalse
    \let\if@thema\iffalse
    \def\@tempa[##1]##2{#1}%
    \ifx\@tempa\@chapter
      \gdef\@chapter[##1]##2{#2}%
      \global\let\newfloat@replace@chapter\@gobbletwo
    \else\ifx\@tempa\Hy@org@chapter
      \gdef\Hy@org@chapter[##1]##2{#2}%
      \global\let\newfloat@replace@chapter\@gobbletwo
    \fi\fi
  \endgroup}
\ifcsname @chapter\endcsname \else
  \let\newfloat@replace@chapter\@gobbletwo
\fi
\newfloat@replace@chapter{%
  \ifnum \c@secnumdepth >\m@ne
    \refstepcounter{chapter}%
    \typeout{\@chapapp\space\thechapter.}%
    \addcontentsline{toc}{chapter}%
      {\protect\numberline{\thechapter}#1}%
  \else
    \addcontentsline{toc}{chapter}{#1}%
  \fi
  \chaptermark{#1}%
  \addtocontents{lof}{\protect\addvspace{10\p@}}%
  \addtocontents{lot}{\protect\addvspace{10\p@}}%
  \if@twocolumn
    \@topnewpage[\@makechapterhead{#2}]%
  \else
    \@makechapterhead{#2}%
    \@afterheading
  \fi
}{%
  \ifnum \c@secnumdepth >\m@ne
    \refstepcounter{chapter}%
    \typeout{\@chapapp\space\thechapter.}%
    \addcontentsline{toc}{chapter}%
      {\protect\numberline{\thechapter}#1}%
  \else
    \addcontentsline{toc}{chapter}{#1}%
  \fi
  \chaptermark{#1}%
  \@addchapterlistsgaps
  \if@twocolumn
    \@topnewpage[\@makechapterhead{#2}]%
  \else
    \@makechapterhead{#2}%
    \@afterheading
  \fi}
\newfloat@replace@chapter{%
  \ifnum \c@secnumdepth >\m@ne
    \if@mainmatter
      \refstepcounter{chapter}%
      \typeout{\@chapapp\space\thechapter.}%
      \addcontentsline{toc}{chapter}%
        {\protect\numberline{\thechapter}#1}%
    \else
      \addcontentsline{toc}{chapter}{#1}%
    \fi
  \else
    \addcontentsline{toc}{chapter}{#1}%
  \fi
  \chaptermark{#1}%
  \addtocontents{lof}{\protect\addvspace{10\p@}}%
  \addtocontents{lot}{\protect\addvspace{10\p@}}%
  \if@twocolumn
    \@topnewpage[\@makechapterhead{#2}]%
  \else
    \@makechapterhead{#2}%
    \@afterheading
  \fi
}{%
  \ifnum \c@secnumdepth >\m@ne
    \if@mainmatter
      \refstepcounter{chapter}%
      \typeout{\@chapapp\space\thechapter.}%
      \addcontentsline{toc}{chapter}%
        {\protect\numberline{\thechapter}#1}%
    \else
      \addcontentsline{toc}{chapter}{#1}%
    \fi
  \else
    \addcontentsline{toc}{chapter}{#1}%
  \fi
  \chaptermark{#1}%
  \@addchapterlistsgaps
  \if@twocolumn
    \@topnewpage[\@makechapterhead{#2}]%
  \else
    \@makechapterhead{#2}%
    \@afterheading
  \fi}
\newfloat@replace@chapter{%
  \refstepcounter{chapter}%
  \ifnum\c@secnumdepth<\z@ \let\@secnumber\@empty
  \else \let\@secnumber\thechapter \fi
  \typeout{\chaptername\space\@secnumber}%
  \def\@toclevel{0}%
  \ifx\chaptername\appendixname \@tocwriteb\tocappendix{chapter}{#2}%
  \else \@tocwriteb\tocchapter{chapter}{#2}\fi
  \chaptermark{#1}%
  \addtocontents{lof}{\protect\addvspace{10\p@}}%
  \addtocontents{lot}{\protect\addvspace{10\p@}}%
  \@makechapterhead{#2}\@afterheading
}{%
  \refstepcounter{chapter}%
  \ifnum\c@secnumdepth<\z@ \let\@secnumber\@empty
  \else \let\@secnumber\thechapter \fi
  \typeout{\chaptername\space\@secnumber}%
  \def\@toclevel{0}%
  \ifx\chaptername\appendixname \@tocwriteb\tocappendix{chapter}{#2}%
  \else \@tocwriteb\tocchapter{chapter}{#2}\fi
  \chaptermark{#1}%
  \@addchapterlistsgaps
  \@makechapterhead{#2}\@afterheading}
\@ifpackageloaded{tocbasic}{%
  \let\newfloat@replace@chapter\@gobbletwo}{}
\ifcsname insertchapterspace\endcsname
  \renewcommand*\insertchapterspace{\@addchapterlistsgaps}
  \let\newfloat@replace@chapter\@gobbletwo
\fi
\newfloat@replace@chapter{%
  \ifnum \c@secnumdepth >\m@ne
    \refstepcounter{chapter}%
    \typeout{\@chapapp\space\thechapter.}%
    \addcontentsline{toc}{chapter}%
      {\protect\numberline{\thechapter}\toc@font0 #1}%
  \else
    \addcontentsline{toc}{chapter}{\toc@font0 #1}%
  \fi
  \chaptermark{#1}%
  \addtocontents{lof}{\protect\addvspace{10\p@}}%
  \addtocontents{lot}{\protect\addvspace{10\p@}}%
  \if@twocolumn
    \@topnewpage[\@makechapterhead{#2}]%
  \else
    \@makechapterhead{#2}%
    \@afterheading
  \fi
}{%
  \ifnum \c@secnumdepth >\m@ne
    \refstepcounter{chapter}%
    \typeout{\@chapapp\space\thechapter.}%
    \addcontentsline{toc}{chapter}%
      {\protect\numberline{\thechapter}\toc@font0 #1}%
  \else
    \addcontentsline{toc}{chapter}{\toc@font0 #1}%
  \fi
  \chaptermark{#1}%
  \@addchapterlistsgaps
  \if@twocolumn
    \@topnewpage[\@makechapterhead{#2}]%
  \else
    \@makechapterhead{#2}%
    \@afterheading
  \fi}
  % boek(3).cls [2004/06/07 v2.1a NTG LaTeX document class]
\newfloat@replace@chapter{%
  \ifnum \c@secnumdepth >\m@ne
    \if@mainmatter
      \refstepcounter{chapter}%
      \typeout{\@chapapp\space\thechapter.}%
      \addcontentsline{toc}{chapter}%
        {\protect\numberline{\thechapter}\toc@font0 #1}%
    \else
      \addcontentsline{toc}{chapter}{\toc@font0 #1}%
    \fi
  \else
    \addcontentsline{toc}{chapter}{\toc@font0 #1}%
  \fi
  \chaptermark{#1}%
  \addtocontents{lof}{\protect\addvspace{10\p@}}%
  \addtocontents{lot}{\protect\addvspace{10\p@}}%
  \if@twocolumn
    \@topnewpage[\@makechapterhead{#2}]%
  \else
    \@makechapterhead{#2}%
    \@afterheading
  \fi
}{%
  \ifnum \c@secnumdepth >\m@ne
    \if@mainmatter
      \refstepcounter{chapter}%
      \typeout{\@chapapp\space\thechapter.}%
      \addcontentsline{toc}{chapter}%
        {\protect\numberline{\thechapter}\toc@font0 #1}%
    \else
      \addcontentsline{toc}{chapter}{\toc@font0 #1}%
    \fi
  \else
    \addcontentsline{toc}{chapter}{\toc@font0 #1}%
  \fi
  \chaptermark{#1}%
  \@addchapterlistsgaps
  \if@twocolumn
    \@topnewpage[\@makechapterhead{#2}]%
  \else
    \@makechapterhead{#2}%
    \@afterheading
  \fi}
\newfloat@replace@chapter{%
  \ifnum \c@secnumdepth >\m@ne
    \if@mainmatter
      \refstepcounter{chapter}%
      \typeout{\chaptername\space\thechapter.}
      \if@thema
        \ifx\@shortauthor\@empty
          \addcontentsline{toc}{chapter}{%
          \protect\numberline{\thechapter.}#1}%
        \else
          \addcontentsline{toc}{chapter}{%
          \protect\numberline{\thechapter.}%
          \@shortauthor\hfill\mbox{}\vskip\normallineskip #1}%
        \fi
      \else
        \addcontentsline{toc}{chapter}{%
        \protect\numberline{\thechapter.}#1}%
      \fi
    \else
      \addcontentsline{toc}{chapter}{#1}
    \fi
  \else
    \addcontentsline{toc}{chapter}{#1}
  \fi
  \chaptermark{#1}
  \addtocontents{lof}{\protect\addvspace{10pt}}
  \addtocontents{lot}{\protect\addvspace{10pt}}
  \if@twocolumn
    \@topnewpage[\@makechapterhead{#2}]
  \else
    \@makechapterhead{#2}
    \@afterheading
  \fi
}{%
  \ifnum \c@secnumdepth >\m@ne
    \if@mainmatter
      \refstepcounter{chapter}%
      \typeout{\chaptername\space\thechapter.}%
      \if@thema
        \ifx\@shortauthor\@empty
          \addcontentsline{toc}{chapter}{%
          \protect\numberline{\thechapter.}#1}%
        \else
          \addcontentsline{toc}{chapter}{%
          \protect\numberline{\thechapter.}%
          \@shortauthor\hfill\mbox{}\vskip\normallineskip #1}%
        \fi
      \else
        \addcontentsline{toc}{chapter}{%
        \protect\numberline{\thechapter.}#1}%
      \fi
    \else
      \addcontentsline{toc}{chapter}{#1}%
    \fi
  \else
    \addcontentsline{toc}{chapter}{#1}%
  \fi
  \chaptermark{#1}%
  \@addchapterlistsgaps
  \if@twocolumn
    \@topnewpage[\@makechapterhead{#2}]%
  \else
    \@makechapterhead{#2}%
    \@afterheading
  \fi}
\ifx\newfloat@replace@chapter\@gobbletwo \else
  \PackageWarningNoLine{newfloat}{%
   Unsupported document class, or\MessageBreak
   \noexpand\@chapter was already redefined by another package}
  \newfloat@Info{\string\@chapter\space=\space\meaning\@chapter}
\fi
\newcommand\newfloat@ForEachNew[2][newfloat@@list]{%
  \AtBeginDocument{%
    \ifcsname#1\endcsname
      \def\@elt##1{#2}%
      \newfloat@@list
      \let\@elt\relax
    \fi}}%
\@onlypreamble\newfloat@ForEachNew
%%    \begin{macrocode}
\newfloat@ForEachNew[float@exts]{%
  \@nameuse{@ifchapterlistsgap@#1}{% if switched on
    \let\float@do=\relax
    \edef\@tempa{%
      \noexpand\float@exts{\the\float@exts\float@do{\@nameuse{ext@#1}}}}%
    \@tempa}}
\newfloat@ForEachNew[FP@floatBegin]{%
  \newcounter{FP@#1C}%
  \newenvironment{FP#1}{\FP@floatBegin{#1}}{\FP@floatEnd}}
\providecommand*\ext@lstlisting{lol}%
\newfloat@ForEachNew[@rotfloat]{%
  \newenvironment{sideways#1}{\@rotfloat{#1}}{\end@rotfloat}%
  \newenvironment{sideways#1*}{\@rotdblfloat{#1}}{\end@rotdblfloat}}
\newcommand*\newfloat@For@SC[2]{%
  \def#1{b}% = \sidecaptionvpos{#2}{b} (v1.6)
  \newenvironment{SC#2}%
    {\SC@float[#1]{#2}}{\endSC@float}%
  \newenvironment{SC#2*}%
    {\SC@dblfloat[#1]{#2}}{\endSC@dblfloat}}
\@onlypreamble\newfloat@For@SC
\newfloat@ForEachNew[SC@float]{%
  \expandafter\newfloat@For@SC\csname SC@#1@vpos\endcsname{#1}}
\newfloat@ForEachNew[wrapfloat]{%
  \newenvironment{wrap#1}{\wrapfloat{#1}}{\endwrapfloat}}
\endinput
%%
%% End of file `newfloat.sty'.
