# Supplementary figures and images for: Lognormal firing rate distribution reveals prominent fluctuation–driven regime in spinal motor networks
Source: eLife journal article supplement (doi:10.7554/elife.18805), 2016-10-26

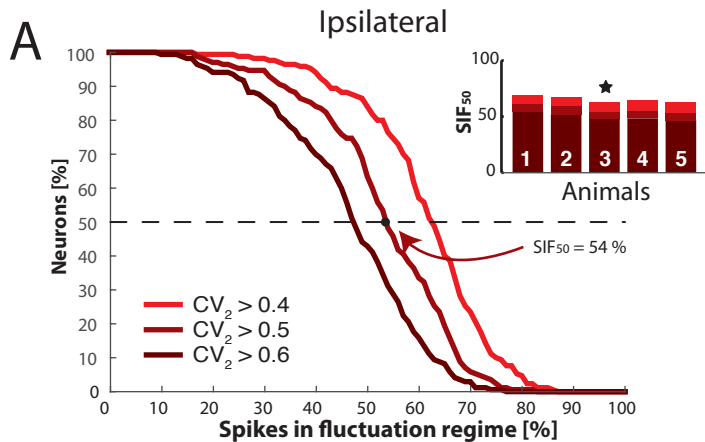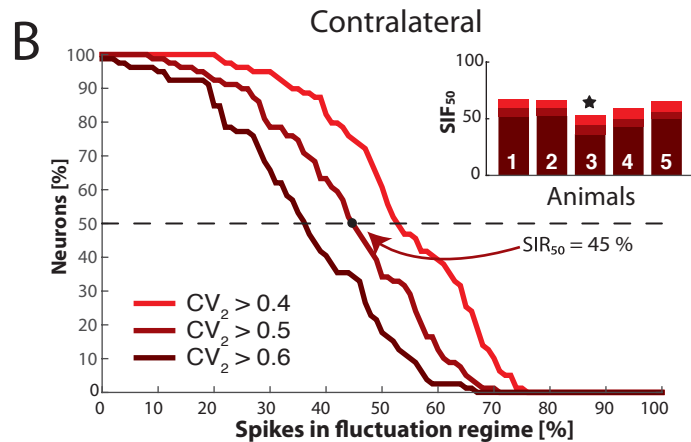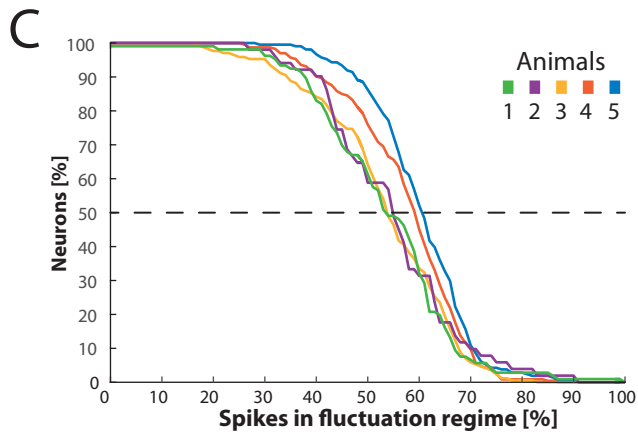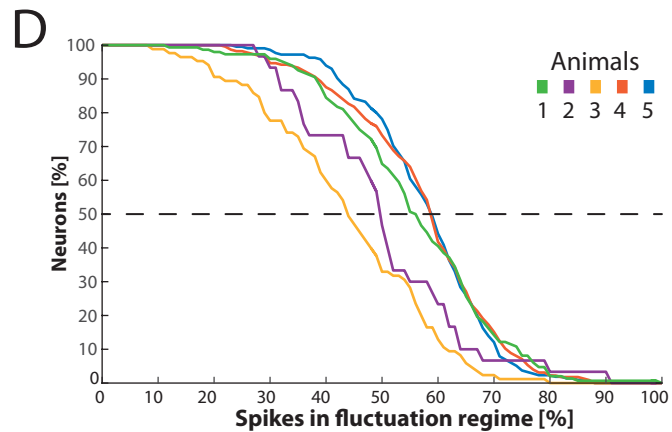

Supplement: supp [file elife-18805-supp-v1.zip]

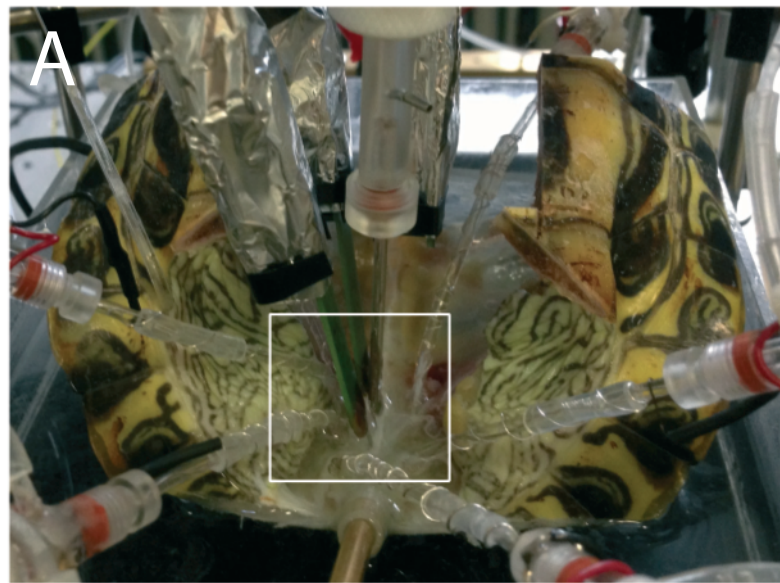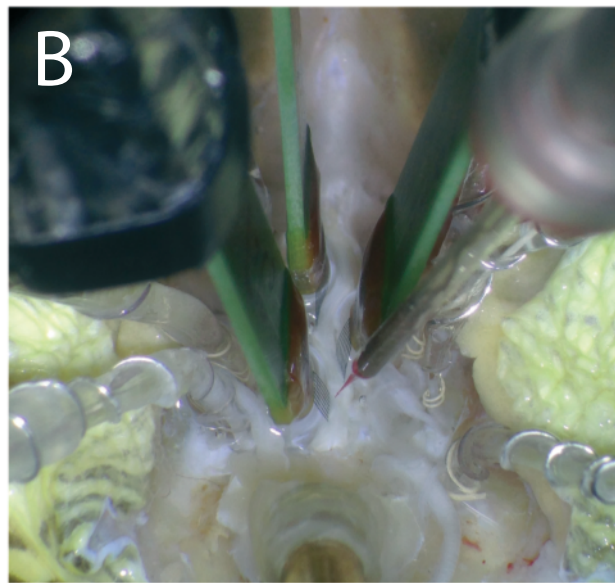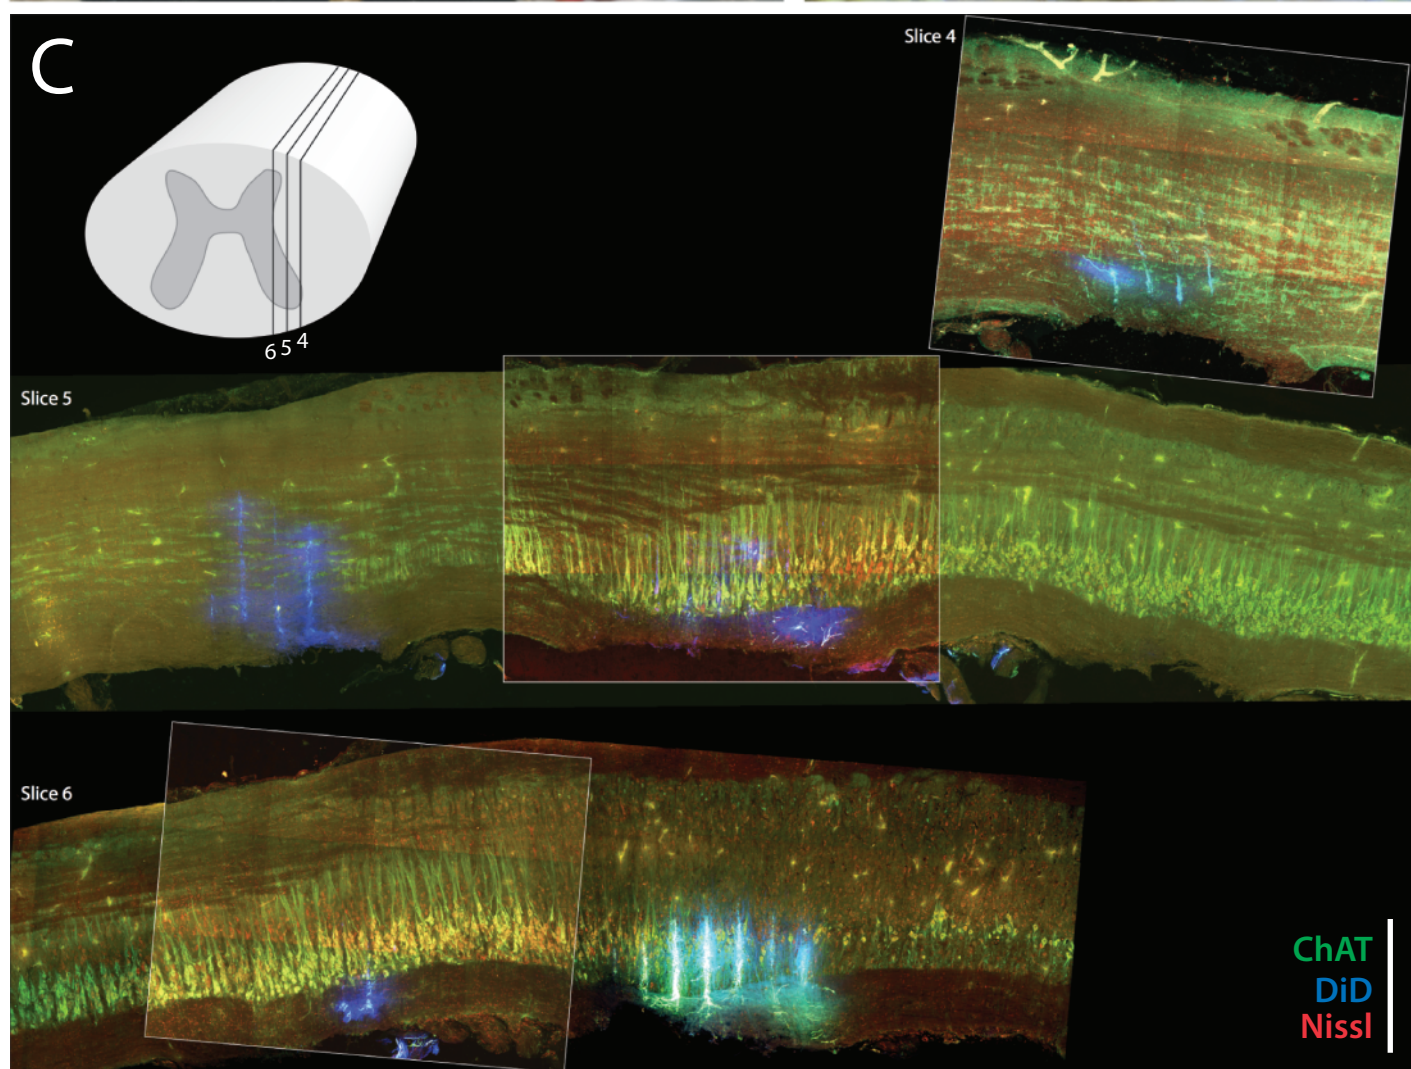

Supplement: supp [file elife-18805-supp-v1.zip]
